# Supplementary material for: Fluorescent probes for detecting monoamine oxidase activity and cell imaging
Source: Royal Society of Chemistry journal article supplement (doi:10.1039/c3ob42326c), 2014-01-01
Supplement: c3ob42326c.pdf [file c3ob42326c.pdf]

# Fluorescent probes for detecting monoamine oxidase activity and cell imaging

Xuefeng Li, Huatang Zhang, Yusheng Xie, Yi Hu, Hongyan Sun\*, Qing Zhu\*

## Supporting Information

### Table of Contents

|                                                           |            |
|-----------------------------------------------------------|------------|
| <b>1. General information.....</b>                        | <b>S1</b>  |
| <b>2. Preparation and characterization of probes.....</b> | <b>S1</b>  |
| <b>3. Limit of detection.....</b>                         | <b>S8</b>  |
| <b>4. Enzymatic activity assays.....</b>                  | <b>S8</b>  |
| <b>5. Enzymatic kinetics assays.....</b>                  | <b>S9</b>  |
| <b>6. Live cell imaging.....</b>                          | <b>S10</b> |

## 1. General information

Compounds were visualized by UV light (254 and 365 nm) and all reactions were monitored by thin layer chromatography (TLC).  $^1\text{H}$  NMR and  $^{13}\text{C}$  NMR spectra were recorded on a 400M Bruker instrument (400 MHz and 100 MHz, respectively). Data for  $^1\text{H}$  NMR are recorded as follows: chemical shift ( $\delta$ , ppm), multiplicity (s = singlet, d = doublet, t = triplet, m = multiplet, q = quartet or unresolved, coupling constant (J) in Hz, integration). Data for  $^{13}\text{C}$  NMR are reported in terms of chemical shift ( $\delta$ , ppm). Mass spectra (MS) were measured with Bruker instrument. Fluorescence spectra were determined on a Multi-Mode Microplate Readers.

## 2. Preparation and characterization of probes

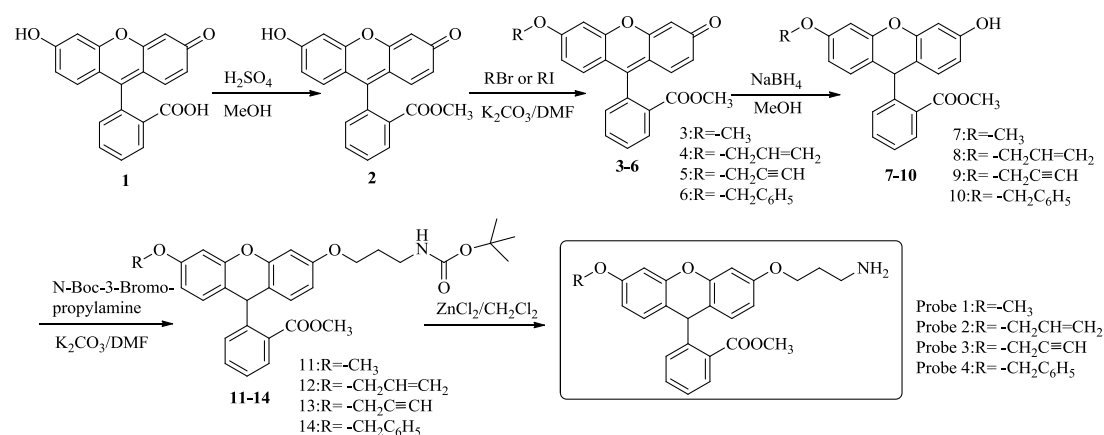

A solution of fluorescein (8 g, 0.24 mmol) in MeOH (45 mL) was added dropwise into concentrated sulfuric acid (6 mL). The reaction was carried out at 85 °C monitored by TLC until completion (~12h). The reaction mixture was poured into 20g of ice-water. Then  $\text{NaHCO}_3$  (24 g) was added to the solution in portions and stirred vigorously at room temperature. A red precipitate was formed; this was collected by filtration, washed with water and petroleum ether, dried and obtained 6.90g product **2**. Yield: 82.7%.

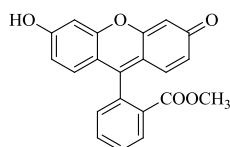

**2-(6-Hydroxy-3-oxo-3H-xantene-9-yl)-benzoic acid methyl ester (2):** red solid, Yield 82.7%,  $^1\text{H NMR}$  (400 MHz,  $\text{CDCl}_3$ ):  $\delta$  8.05 (dd,  $J = 1.2, 0.8$  Hz, 1H), 7.74 (m, 2H), 7.64 (m, 1H), 6.41 (d,  $J = 9.2$  Hz, 2H), 6.03 (dd,  $J = 2.0, 2.0$  Hz, 2H), 5.97 (d,  $J = 2.0$  Hz, 2H), 3.55 (s, 3H); ESI-MS  $m/z$  347.1 ( $M+1$ ) $^+$ .

Appropriate bromide and iodide (3.6 mmol) was added to the mixture of **2** (1.0 g, 2.9 mmol) and  $\text{K}_2\text{CO}_3$  (0.598 g, 4.5 mmol) in 30 mL of DMF at room temperature. After stirring for 24 hours, the product was extracted with  $\text{CH}_2\text{Cl}_2$  (100 mL  $\times$  3), and the organic layer was washed with water (100 mL  $\times$  2) and brine (100 mL), dried over  $\text{Na}_2\text{SO}_4$  and concentrated under reduced pressure. Yield: 91.5 % for **3** (0.94 g, orange solid); 91.5 % for **4** (1.00 g, orange powder); 90 % for **5** (0.99 g, orange powder); 80 % for **6** (1.00 g, orange solid).

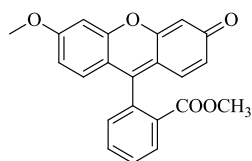

**2-(6-Methoxy-3-oxo-3H-xantene-9-yl)-benzoic acid methyl ester (3):** orange solid, Yield 91.5%,  $^1\text{H NMR}$  (400 MHz,  $(\text{CD}_3)_2\text{SO}$ ):  $\delta$  8.22 (dd,  $J = 7.8, 1.3$  Hz, 1H), 7.72 (td,  $J = 7.5, 1.4$  Hz, 1H), 7.65 (td,  $J = 7.6, 1.4$  Hz, 1H), 7.29 (dd,  $J = 7.5, 1.2$  Hz, 1H), 6.94 (d,  $J = 2.4$  Hz, 1H), 6.85 (dd,  $J = 14.6, 9.3$  Hz, 2H), 6.72 (dd,  $J = 8.9, 2.5$  Hz, 1H), 6.52 (dd,  $J = 9.7, 1.9$  Hz, 1H), 6.44 (d,  $J = 1.9$  Hz, 1H), 3.91 (s, 3H), 3.63 (s, 3H); ESI-MS  $m/z$  361.1 ( $M+1$ ) $^+$ .

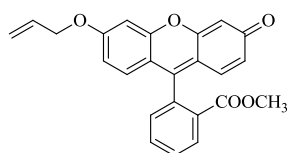

**2-(6-allyloxy-3-oxo-3H-xantene-9-yl)-benzoic acid methyl ester (4):** orange powder, 91.5 %,  $^1\text{H NMR}$  (400 MHz,  $\text{CDCl}_3$ ):  $\delta$  8.17 (dd,  $J = 7.8, 1.1$  Hz, 1H), 7.68 (td,  $J = 7.4, 1.3$  Hz, 1H), 7.61 (td,  $J = 7.6, 1.3$  Hz, 1H), 7.25 (dd,  $J = 7.4, 1.0$  Hz, 1H), 6.90 (d,

$J = 2.4$  Hz, 1H), 6.82 (dd,  $J = 15.2, 9.2$  Hz, 2H), 6.71 (dd,  $J = 8.8, 2.4$  Hz, 1H), 6.47 (dd,  $J = 9.6, 1.8$  Hz, 1H), 6.38 (d,  $J = 1.8$  Hz, 1H), 5.99 (m, 1H), 5.42 (d,  $J = 1.3$  Hz, 1H), 5.38 (d,  $J = 1.3$  Hz, 1H), 4.60 (d,  $J = 5.3$  Hz, 2H), 3.61 (s, 3H); ESI-MS  $m/z$  387.1 (M+1)<sup>+</sup>.

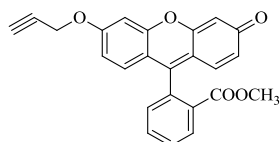

**2-(6-(prop-2-ynyloxy)-3-oxo-3H-xanthen-9-yl) benzoic acid methyl ester (5):** orange solid, yield 90%, <sup>1</sup>H NMR (400 MHz, CDCl<sub>3</sub>):  $\delta$  8.24 (d,  $J = 7.8$  Hz, 1H), 7.73 (t,  $J = 7.4$  Hz, 1H), 7.67 (t,  $J = 7.6$  Hz, 1H), 7.30 (d,  $J = 7.5$  Hz, 1H), 7.05 (d,  $J = 2.2$  Hz, 1H), 6.90 (d,  $J = 8.9$  Hz, 1H), 6.85 (d,  $J = 9.6$  Hz, 1H), 6.79 (dd,  $J = 8.9, 2.2$  Hz, 1H), 6.56 – 6.48 (m, 1H), 6.44 (d,  $J = 1.1$  Hz, 1H), 4.79 (d,  $J = 2.1$  Hz, 2H), 3.64 (s, 3H), 3.52 (s, 1H); ESI-MS  $m/z$  385.1 (M+1)<sup>+</sup>.

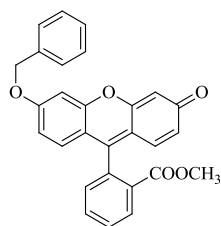

**2-(6-benzyloxy-3-oxo-3H-xanthen-9-yl) benzoic acid methyl ester (6):** orange solid, yield 80%, <sup>1</sup>H NMR (400 MHz, CDCl<sub>3</sub>):  $\delta$  8.23 (d,  $J = 7.8$  Hz, 1H), 7.72 (t,  $J = 7.4$  Hz, 1H), 7.65 (t,  $J = 7.6$  Hz, 1H), 7.37 (dt,  $J = 13.3, 7.4$  Hz, 5H), 7.32 – 7.02 (m, 2H), 7.00 (d,  $J = 2.3$  Hz, 1H), 6.89 (d,  $J = 8.9$  Hz, 1H), 6.87 – 6.77 (m, 2H), 6.52 (d,  $J = 9.7$  Hz, 1H), 5.13 (s, 2H), 3.62 (s, 3H); ESI-MS  $m/z$  437.1 (M+1)<sup>+</sup>.

To a solution of corresponding **3-6** (3.0 mmol) in MeOH (10 mL) was added NaBH<sub>4</sub> (0.57 g, 15.0 mmol) at 0 °C. The reaction was stirred in an ice-water bath for 30 min, and at room temperature for 2 h. After removal of the solvent, the product was extracted with CH<sub>2</sub>Cl<sub>2</sub> (50 mL×3), and the organic layer was washed with brine (50 mL), dried over Na<sub>2</sub>SO<sub>4</sub> and concentrated under reduced pressure to yield the homologous air-sensitive product **7-10** as yellow powder.

Appropriate compound **7-10** (2.7 mmol) was dissolved in DMF (30 mL). Then,  $K_2CO_3$  (0.559 g, 4.05 mmol) and N-Boc-3-bromopropylamine (0.771 g, 3.24 mmol) were added to the solution. The mixture was stirred at r.t for 6 hours. The remaining solid residue was removed by filtration. The filtrate was concentrated and purified by  $SiO_2$  chromatography ( $CH_2Cl_2$ : MeOH = 50:1). Yield: 70.4 % for **11** (1.00 g, white solid); 72% for **12** (1.07 g, white solid); 75 % for **13** (1.11 g, white solid); 80 % for **14** (1.30 g, white solid).

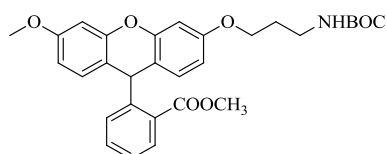

**methyl 2-(3-(3-((tert-butoxycarbonyl)amino)propoxy)-6-methoxy-9H-xanthen-9-yl)benzoate (11)**: white solid, yield 70.4%,  $^1H$  NMR (400 MHz,  $CDCl_3$ ):  $\delta$  7.65 (d,  $J$  = 7.8 Hz, 1H), 7.15 (t,  $J$  = 7.5 Hz, 1H), 7.06 – 6.94 (m, 2H), 6.82 (dd,  $J$  = 8.5, 4.2 Hz, 2H), 6.54 – 6.48 (m, 2H), 6.42 – 6.34 (m, 2H), 6.10 (s, 1H), 4.96 (s, 1H), 3.88 – 3.76 (m, 5H), 3.61 (s, 3H), 3.17 (d,  $J$  = 5.8 Hz, 2H), 1.86 – 1.77 (m, 2H), 1.33 (s, 9H); ESI-MS  $m/z$  520.1 ( $M+1$ ) $^+$ .

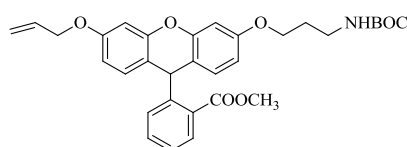

**methyl 2-(3-(allyloxy)-6-(3-((tert-butoxycarbonyl)amino)propoxy)-9H-xanthen-9-yl)benzoate (12)**: white solid, yield 72%,  $^1H$  NMR (400 MHz,  $CDCl_3$ ):  $\delta$  7.67 (d,  $J$  = 8.9 Hz, 1H), 7.19 (t,  $J$  = 7.6 Hz, 1H), 7.10 – 6.96 (m, 2H), 6.82 (dd,  $J$  = 8.6, 1.9 Hz, 2H), 6.53 (dd,  $J$  = 9.5, 2.5 Hz, 2H), 6.41 (ddd,  $J$  = 13.0, 8.5, 2.5 Hz, 2H), 6.09 (s, 1H), 5.87 (m, 1H), 5.29 (d,  $J$  = 17.2 Hz, 1H), 5.16 (d,  $J$  = 10.5 Hz, 1H), 4.73 (s, 1H), 4.40 (d,  $J$  = 5.3 Hz, 2H), 3.90 – 3.83 (m, 5H), 3.20 (d,  $J$  = 5.9 Hz, 2H), 1.89 – 1.82 (m, 2H), 1.34 (s, 9H); ESI-MS  $m/z$  546.1 ( $M+1$ ) $^+$ .

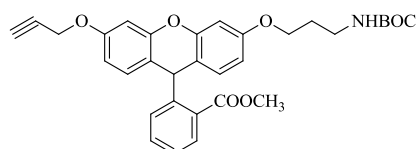

**methyl 2-(3-(3-((tert-butoxycarbonyl)amino)propoxy)-6-(prop-2-yn-1-yloxy)-9H-xanthen-9-yl)benzoate (13):** white solid, yield 75%,  $^1\text{H NMR}$  (400 MHz,  $\text{CDCl}_3$ ):  $\delta$  7.67 (d,  $J = 8.8$  Hz, 1H), 7.17 (dd,  $J = 13.9, 6.5$  Hz, 1H), 7.05 (t,  $J = 7.5$  Hz, 1H), 6.97 (d,  $J = 7.8$  Hz, 1H), 6.82 (dd,  $J = 16.4, 8.6$  Hz, 2H), 6.61 (d,  $J = 2.5$  Hz, 1H), 6.51 (d,  $J = 2.4$  Hz, 1H), 6.46 (dd,  $J = 8.6, 2.5$  Hz, 1H), 6.39 (dd,  $J = 8.5, 2.5$  Hz, 1H), 6.09 (s, 1H), 4.80 (s, 1H), 4.53 (s, 2H), 3.91 – 3.78 (m, 5H), 3.18 (d,  $J = 6.0$  Hz, 2H), 2.43 (s, 1H), 1.89 – 1.79 (m, 2H), 1.33 (s, 9H); ESI-MS  $m/z$  544.3 ( $\text{M}+1$ ) $^+$ .

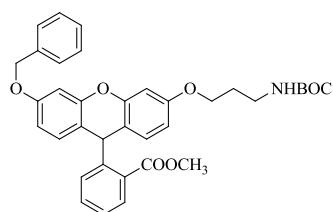

**methyl 2-(3-(benzyloxy)-6-(3-((tert-butoxycarbonyl)amino)propoxy)-9H-xanthen-9-yl)benzoate (14):** white solid, yield 80%,  $^1\text{H NMR}$  (400 MHz,  $\text{CDCl}_3$ ):  $\delta$  7.6 – 7.61 (m, 1H), 7.18 (ddd,  $J = 33.4, 17.8, 7.8$  Hz, 6H), 6.98 (dd,  $J = 16.7, 7.5$  Hz, 2H), 6.82 – 6.76 (m, 2H), 6.58 (d,  $J = 2.5$  Hz, 1H), 6.49 – 6.41 (m, 2H), 6.37 – 6.32 (m, 1H), 6.07 (s, 1H), 4.85 (s, 3H), 3.84 – 3.75 (m, 5H), 3.14 (t, 2m), 1.85 – 1.72 (m, 2H), 1.31 (s, 9H); ESI-MS  $m/z$  596.4 ( $\text{M}+1$ ) $^+$ .

To a solution of compound **11–14** (1 mmol) in  $\text{CH}_2\text{Cl}_2$  (5 mL) was added  $\text{ZnCl}_2$  (0.27 g, 2 mmol) at room temperature and the resulting mixture was stirred for 3 hours. The remaining solid residue was removed by filtration. The filtrate was extracted with  $\text{CH}_2\text{Cl}_2$  (50 mL  $\times$  3), and the organic layer was washed with  $\text{NaHCO}_3$  solution and brine, dried over  $\text{Na}_2\text{SO}_4$  and concentrated under reduced pressure to yield the air-sensitive product. Yield: 47.7 % for **probe1** (0.2 g, white solid); 50% for **probe2** (0.22 g, white solid); 40 % for **probe3** (0.18 g, white solid); 42 % for **probe4** (0.21 g, white solid).

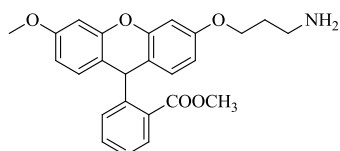

**methyl 2-(3-(3-aminopropoxy)-6-methoxy-9H-xanthen-9-yl)benzoate (probe 1):**  
white solid, yield 47.7%,  $^1\text{H}$  NMR (400 MHz,  $\text{CDCl}_3$ )  $\delta$  7.66 (dd,  $J = 7.8, 1.3$  Hz, 1H), 7.22–7.13 (m, 1H), 7.08–7.03 (m, 1H), 7.00–6.95 (m, 1H), 6.81 (dd,  $J = 8.6, 4.4$  Hz, 2H), 6.52 (d,  $J = 2.5$  Hz, 2H), 6.40 (dt,  $J = 8.5, 2.4$  Hz, 2H), 6.08 (s, 1H), 3.90 (t,  $J = 6.0$  Hz, 2H), 3.83 (s, 3H), 3.66 (s, 3H), 3.02 (s, 2H), 2.84 (s, 2H), 1.91–1.81 (m, 2H);  $^{13}\text{C}$  NMR (101 MHz,  $\text{CDCl}_3$ )  $\delta$  168.50, 159.03, 158.24, 151.22, 151.22, 148.05, 132.19, 131.55, 130.38, 130.38, 130.38, 129.32, 129.32, 125.87, 116.82, 110.51, 110.04, 101.70, 101.06, 65.94, 55.39, 52.29, 38.96, 37.92, 31.82. ESI-MS  $m/z$  420.1 ( $\text{M}+1$ ) $^+$ .

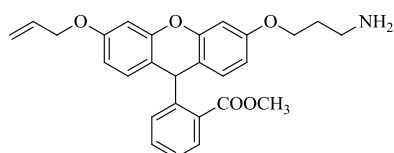

**methyl 2-(3-(allyloxy)-6-(3-aminopropoxy)-9H-xanthen-9-yl)benzoate (probe 2):**  
white solid, yield 50%,  $^1\text{H}$  NMR (400 MHz,  $\text{CDCl}_3$ )  $\delta$  7.64 (d,  $J = 6.6$  Hz, 1H), 7.15 (t,  $J = 8.0$  Hz, 1H), 7.07 – 6.99 (m, 1H), 6.97 (d,  $J = 7.8$  Hz, 1H), 6.87 – 6.77 (m, 2H), 6.54 – 6.46 (m, 2H), 6.40 (td,  $J = 8.6, 2.2$  Hz, 2H), 6.07 (d,  $J = 6.5$  Hz, 1H), 5.89 (ddd,  $J = 22.1, 10.5, 5.3$  Hz, 1H), 5.26 (d,  $J = 17.2$  Hz, 1H), 5.17–5.10 (m, 1H), 4.36 (d,  $J = 4.8$  Hz, 2H), 3.94–3.76 (m, 5H), 2.80 (dt,  $J = 20.4, 6.8$  Hz, 2H), 1.93–1.75 (m, 2H);  $^{13}\text{C}$  NMR (101 MHz,  $\text{CDCl}_3$ )  $\delta$  168.24, 158.09, 157.83, 151.00, 147.89, 132.85, 132.85, 131.99, 131.38, 130.19, 130.19, 130.19, 129.04, 129.04, 125.69, 117.24, 116.81, 110.49, 110.32, 101.80, 101.53, 68.71, 65.67, 52.09, 38.58, 37.69, 31.46. ESI-MS  $m/z$  446.5 ( $\text{M}+1$ ) $^+$ .

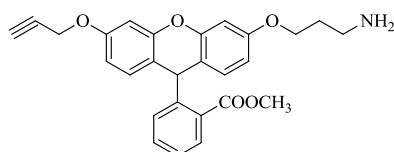

**methyl 2-(3-(3-aminopropoxy)-6-(prop-2-yn-1-yloxy)-9H-xanthen-9-yl)benzoate**

**(probe 3):** white solid, yield 40%,  $^1\text{H NMR}$  (400 MHz,  $\text{CDCl}_3$ )  $\delta$  7.74 – 7.61 (m, 1H), 7.24 – 7.15 (m, 1H), 7.06 (t,  $J = 7.1$  Hz, 1H), 6.97 (d,  $J = 7.7$  Hz, 1H), 6.88 – 6.77 (m, 2H), 6.60 (s, 1H), 6.48 (dd,  $J = 8.3, 6.5$  Hz, 2H), 6.38 (dd,  $J = 13.6, 6.2$  Hz, 1H), 6.11 – 6.05 (m, 1H), 4.55 (s, 2H), 4.14 (s, 2H), 4.00 – 3.76 (m, 5H), 2.94 (s, 2H), 2.44 (s, 1H), 2.08 – 1.82 (m, 2H); ESI-MS  $m/z$  444.5 ( $\text{M}+1$ ) $^+$ .

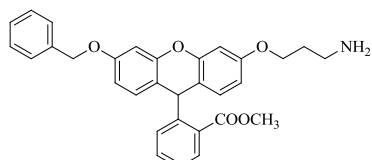

**methyl 2-(3-(3-aminopropoxy)-6-(benzyloxy)-9H-xanthen-9-yl)benzoate (probe 4):** white solid, yield 42%.  $^1\text{H NMR}$  (400 MHz,  $\text{CDCl}_3$ )  $\delta$  7.64 (d,  $J = 7.1$  Hz, 1H), 7.32 – 7.15 (m, 6H), 7.03 (t,  $J = 7.5$  Hz, 1H), 6.95 (d,  $J = 7.7$  Hz, 1H), 6.78 (t,  $J = 8.3$  Hz, 2H), 6.57 (d,  $J = 2.4$  Hz, 1H), 6.49 – 6.44 (m, 2H), 6.38 (dd,  $J = 8.5, 2.3$  Hz, 1H), 6.04 (s, 1H), 5.54 (s, 2H), 4.87 (s, 2H), 3.88 – 3.78 (m, 5H), 3.04 (s, 2H), 2.11 – 1.98 (m, 2H); ESI-MS  $m/z$  496.4 ( $\text{M}+1$ ) $^+$ .

### 3. Limit of detection

The limit of detection, expressed as the concentration,  $c_L$ ,

$$c_L = 3 \sigma / m,$$

$$\sigma = \sqrt{\frac{\sum(\bar{x} - x_i)^2}{n-1}}$$

$\bar{x}$  is the mean of the blank measures (just probe only),  $x_i$  is the values of blank measures,  $n$  is the tested number of blank measure.  $m$  is the slope of the linear regression equation.

### 4. Enzymatic activity assays

MAO-A and MAO-B were prepared from human placenta and beef liver respectively and the crude enzymes were used directly to approach the in vivo environment. The stock solutions of Probe 1-4 were prepared in DMSO (10mM) and diluted in 100 mM aqueous borate buffer (pH = 8.4) to a final concentration 200  $\mu\text{M}$ . All fluorescence spectra were performed in 96-well plates. MAO A, MAO B, diamineoxidase and heat-inactivated enzyme were added to a final protein concentration 16  $\mu\text{g/mL}$  and



incubation for 40 min at 37 °C, respectively. Fluorescence intensity of Probe 1-4 were collected by microplate reader and the excitation wavelength was 470 nm. The results are shown in Figure S1 and Figure S2.

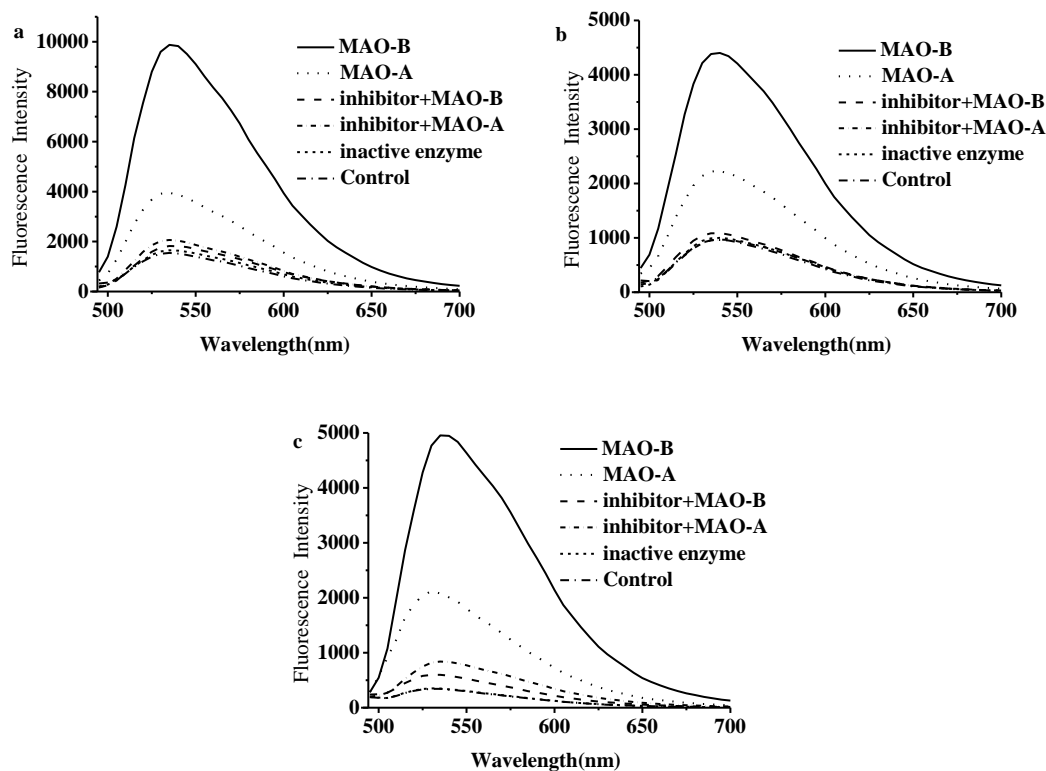

**Fig.S1(a-c)** Fluorescence of probe 2-4 before and after reaction with MAO-B (dot line), MAO-A (short dash line) and corresponding inhibitor, inactive enzyme. The spectra were recorded in 100 mM borate buffer (pH = 8.4) at  $\lambda_{\text{ex}} = 470$  nm.

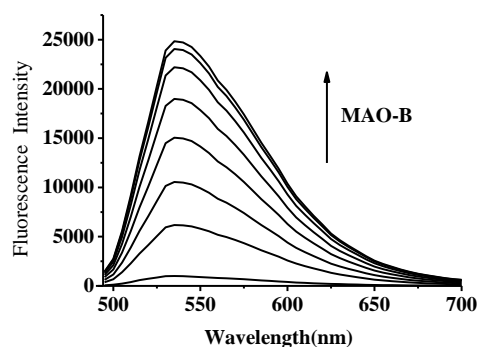

**Fig. S2** Fluorescence of probe 1 (200  $\mu\text{M}$ ) treated with different concentrations of MAO-B, [Enzyme] = 0-300  $\mu\text{g/mL}$ , pH=8.4, borate buffer.

## 5. Enzymatic kinetics assays

Enzyme kinetics experiments were performed in 96-well fluorescence assay plates. A series of different concentrations of probe 1-4 was diluted in enzyme assay buffer (100 mM Borate buffer, pH = 8.4) to a final concentration containing (0-200  $\mu\text{M}$ ). The fluorescence intensity was collected at 535 nm ( $\lambda_{\text{ex}} = 470$  nm) by using Molecular Devices Spectramax M2 Microplate Fluorometer at 5 min intervals from 0 to 1 h at 37  $^{\circ}\text{C}$ . Enzyme kinetics experiments with Probe 1-4 and MAO-A or MAO-B were performed on three independent experiments.

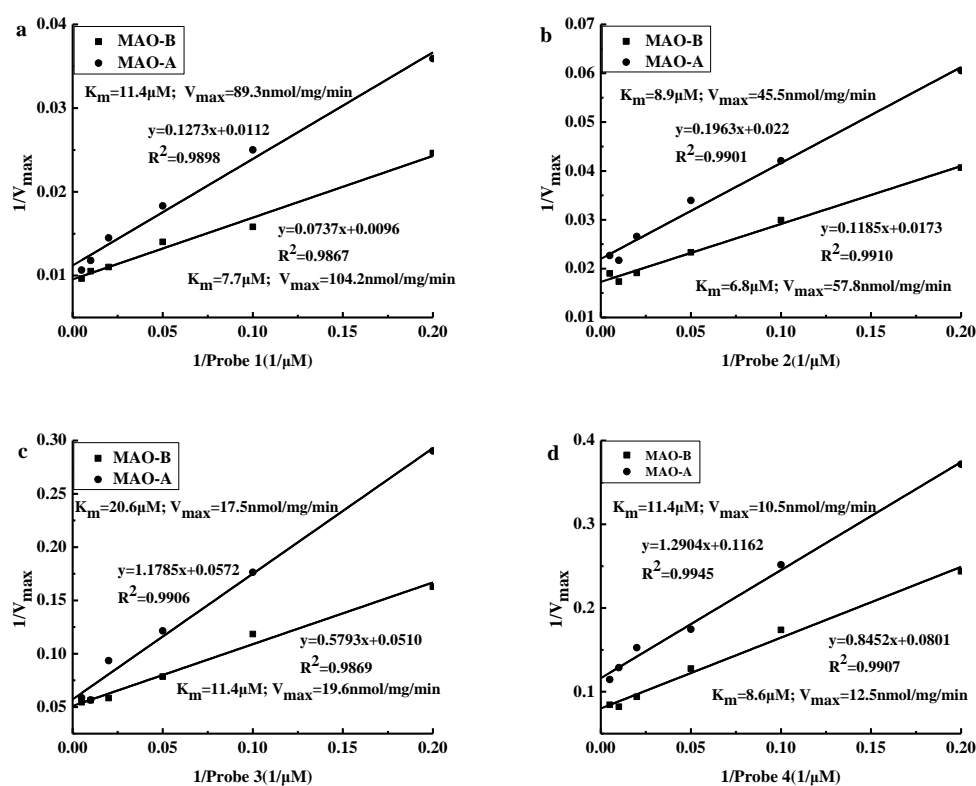

**Fig.S3(a-d)**  $K_m$  values of Probe 1-4 with MAO-A and MAO-B. The  $K_m$  and  $V_{\text{max}}$  value of MAO-A or MAO-B was assessed by a series concentrations of Probe 1-4(0-200 $\mu\text{M}$ ) reaction with MAO-A or MAO-B (16 $\mu\text{g}/\text{mL}$ ) at 37  $^{\circ}\text{C}$  in enzyme assay buffer(borate buffer, pH=8.4). The fluorescence intensity was collected at 535nm ( $\lambda_{\text{ex}}=470\text{nm}$ ).

## 6. Live cell imaging

Experiments were performed as following steps. First, MCF-7 cells were cultured in chamber at 37  $^{\circ}\text{C}$ , and after 80% confluence, the medium was removed followed by

washing with PBS buffer twice. Next, the probe1 (50  $\mu\text{M}$ ) were then added to the chamber in the growth medium separately. After incubation in a 5%  $\text{CO}_2$  incubator for 3 h at 37  $^\circ\text{C}$ , cells were washed twice with PBS buffer to remove the extracellular probes, and further fixed by 75% ethanol for 30 min. Cell imaging experiments were conducted with a fluorescence microscope. Moreover, the cells were treated with MAO inhibitor selegiline for 90 minutes at 37  $^\circ\text{C}$  in a 5%  $\text{CO}_2$  incubator. Probe 1 were then added to final concentrations of 50  $\mu\text{M}$  and incubated for 2 hours, cells were then washed twice with PBS buffer to remove the extracellular inhibitors and probes, and further fixed by 75% ethanol for 30 min. Following that, the cells were imaged with a fluorescence microscope.
