# Supplementary figures and images for: Fluorescent probes for detecting monoamine oxidase activity and cell imaging
Source: Royal Society of Chemistry journal article supplement (doi:10.1039/c3ob42326c), 2014-01-01

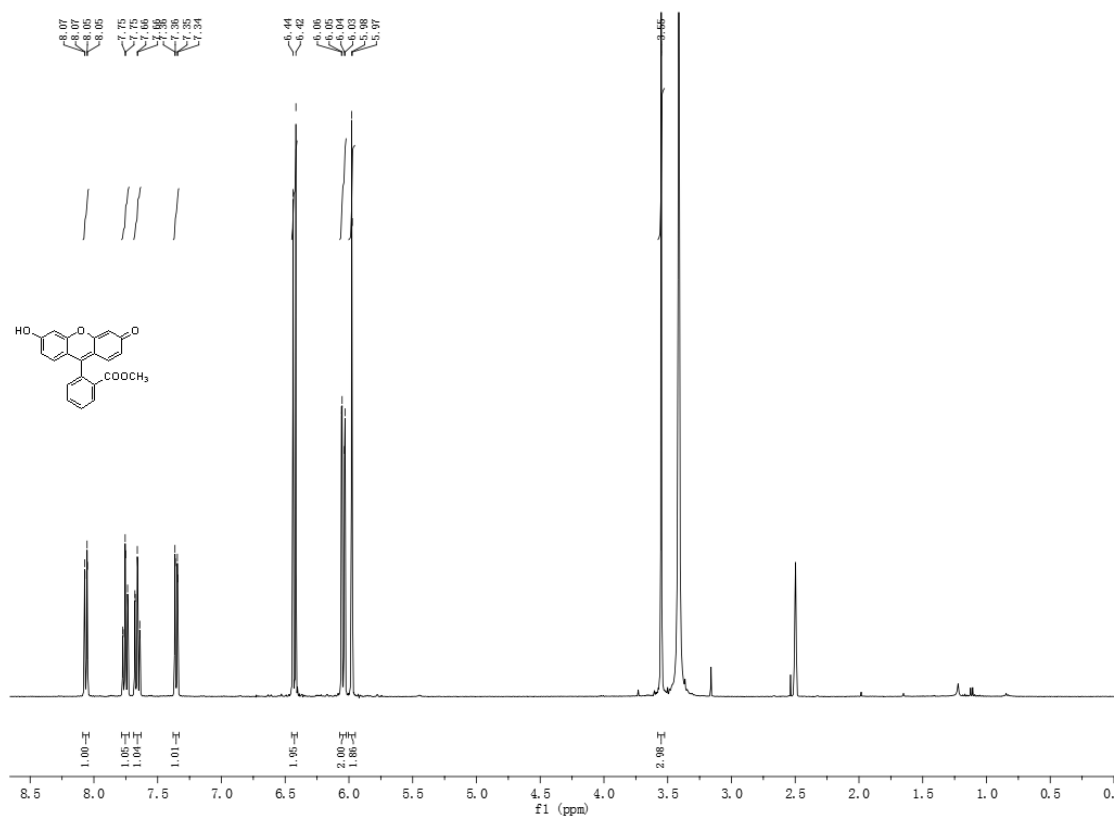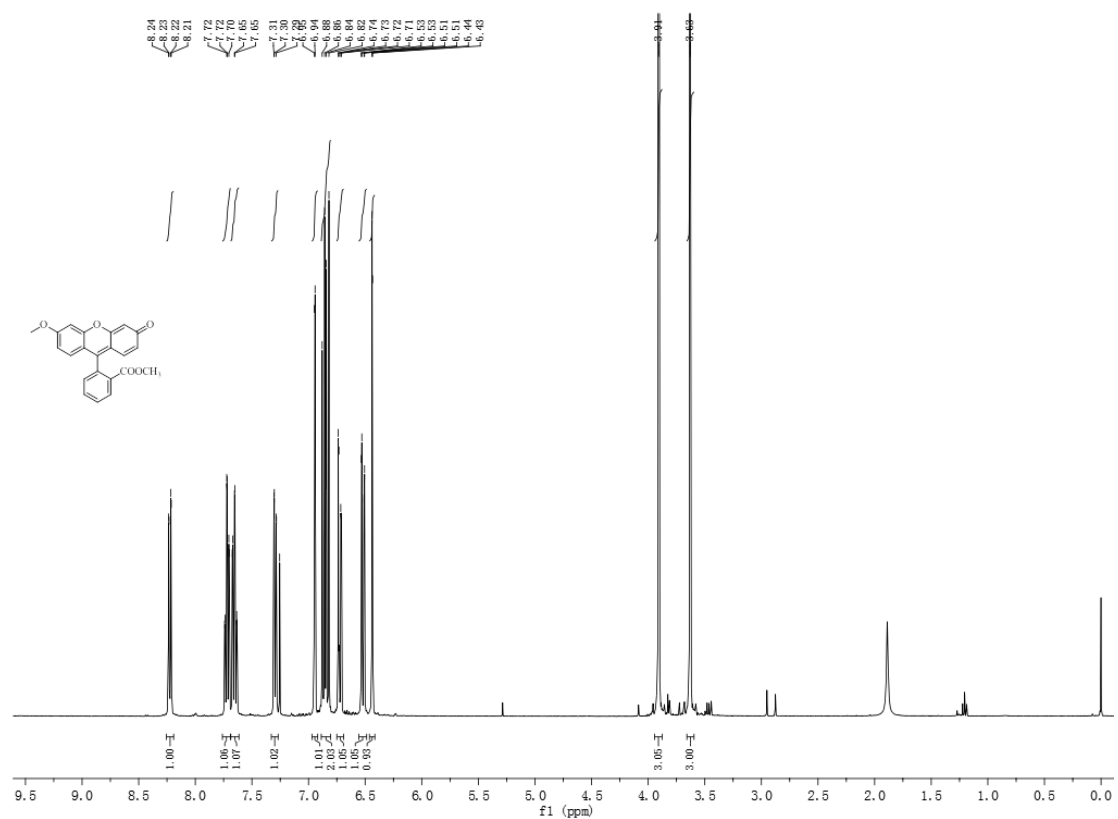

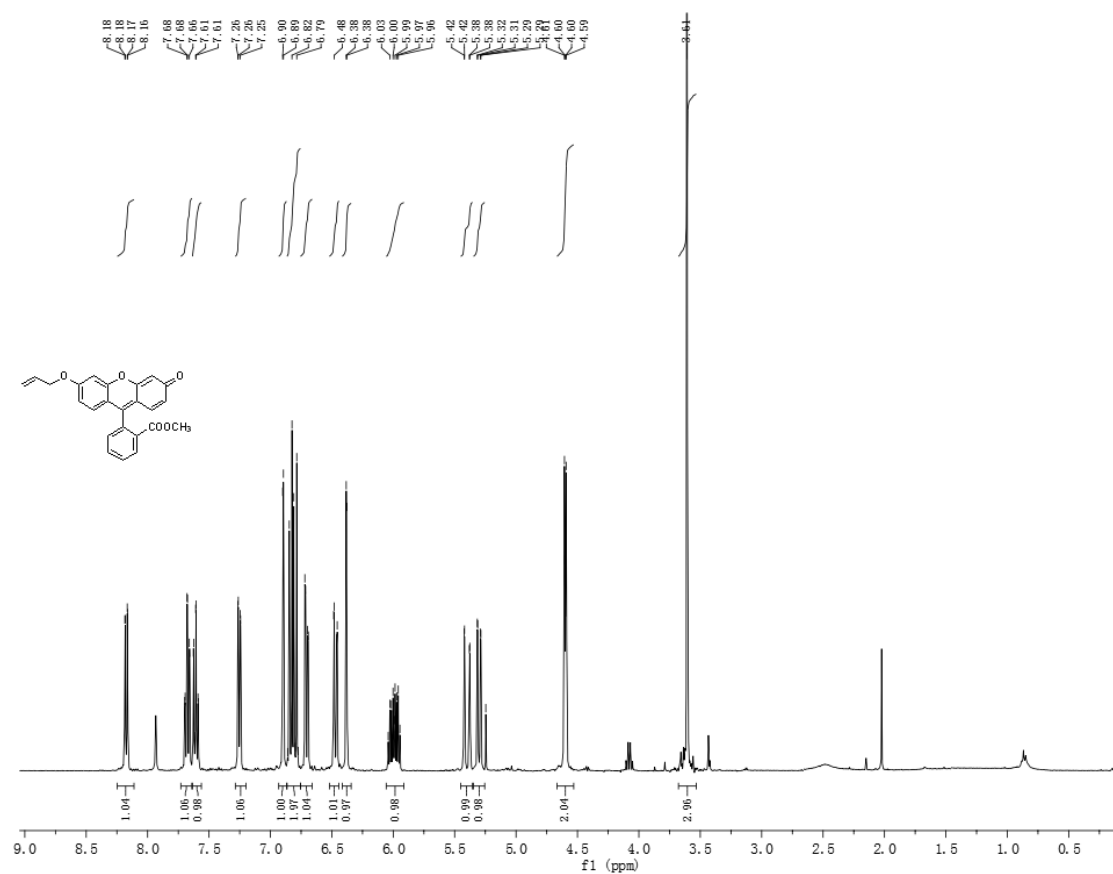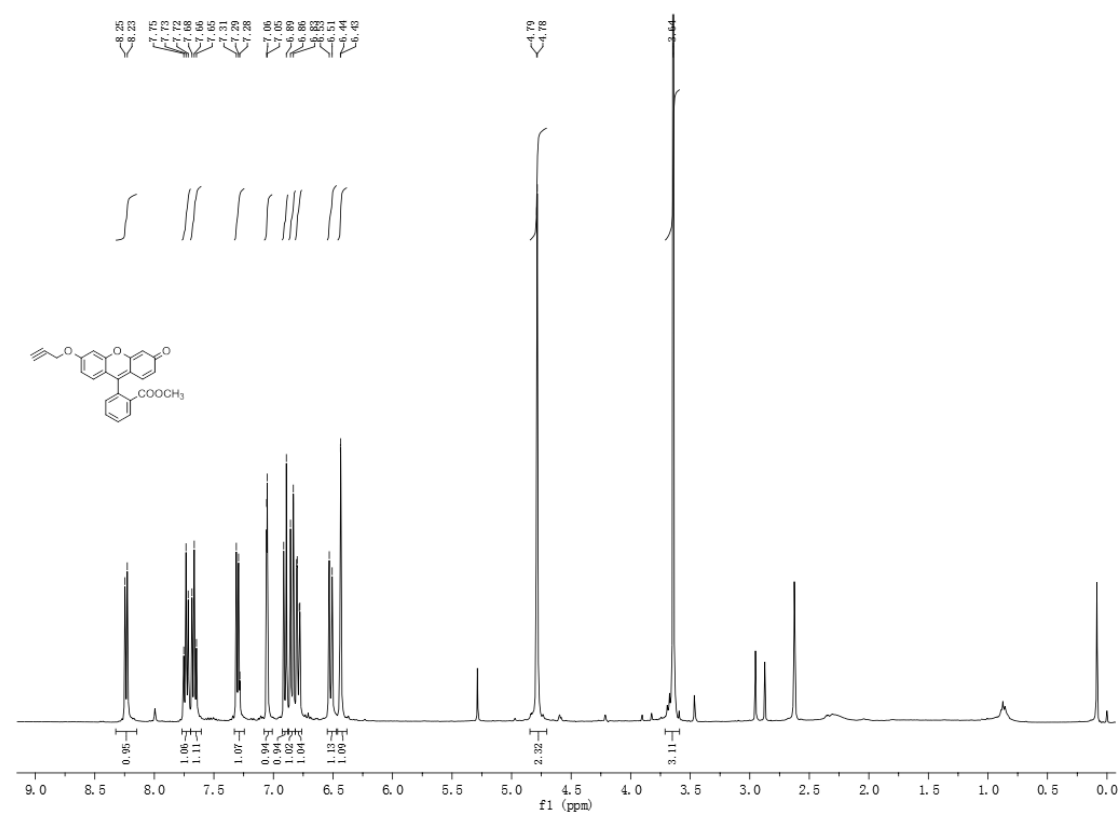

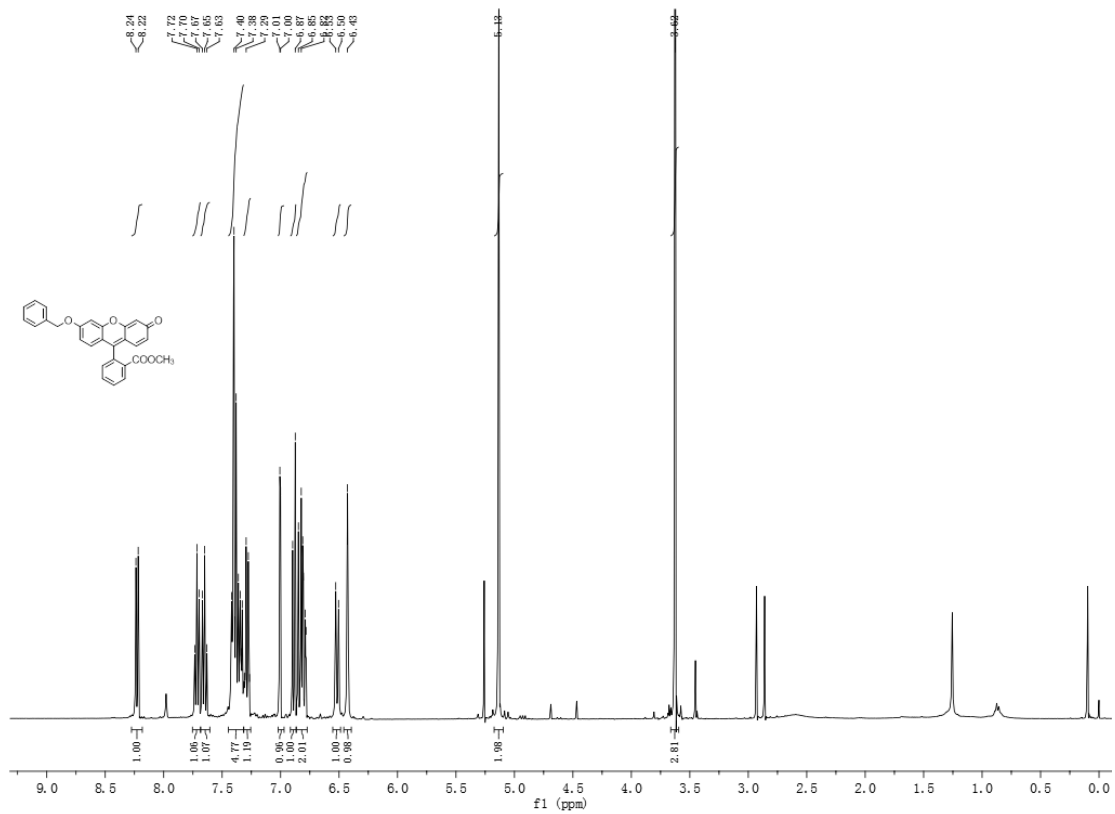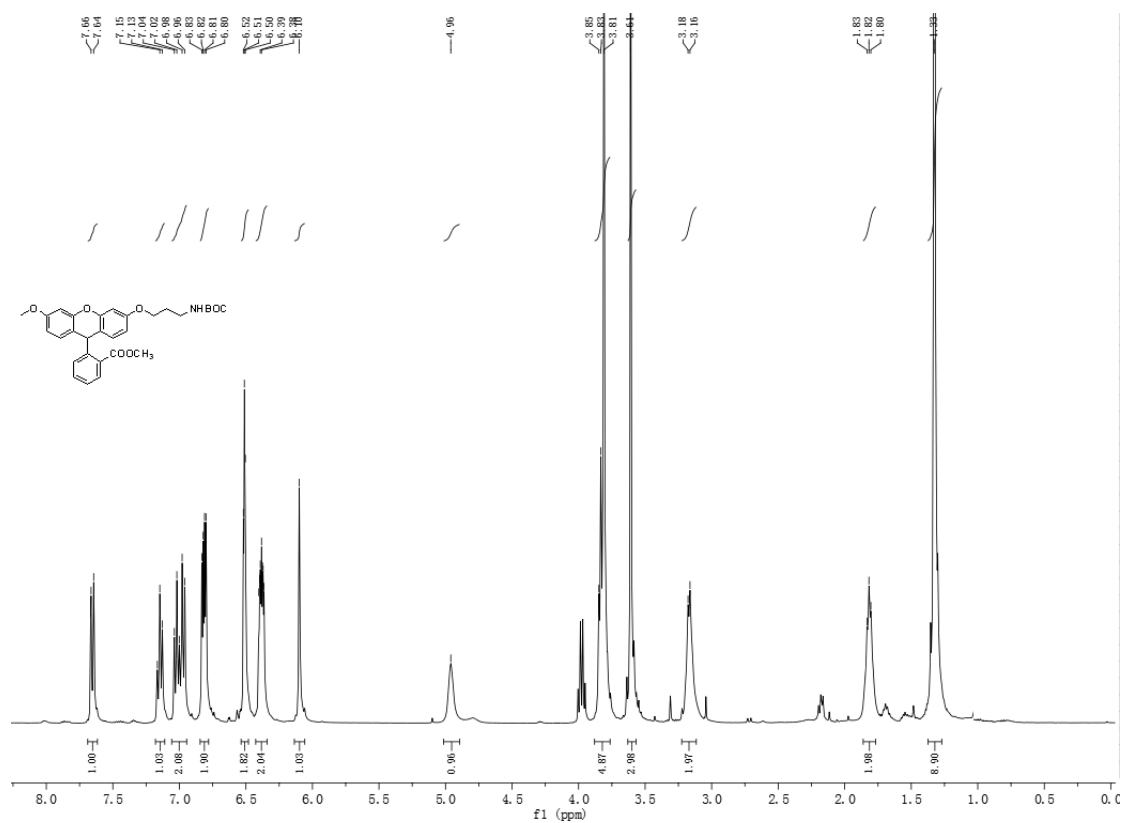

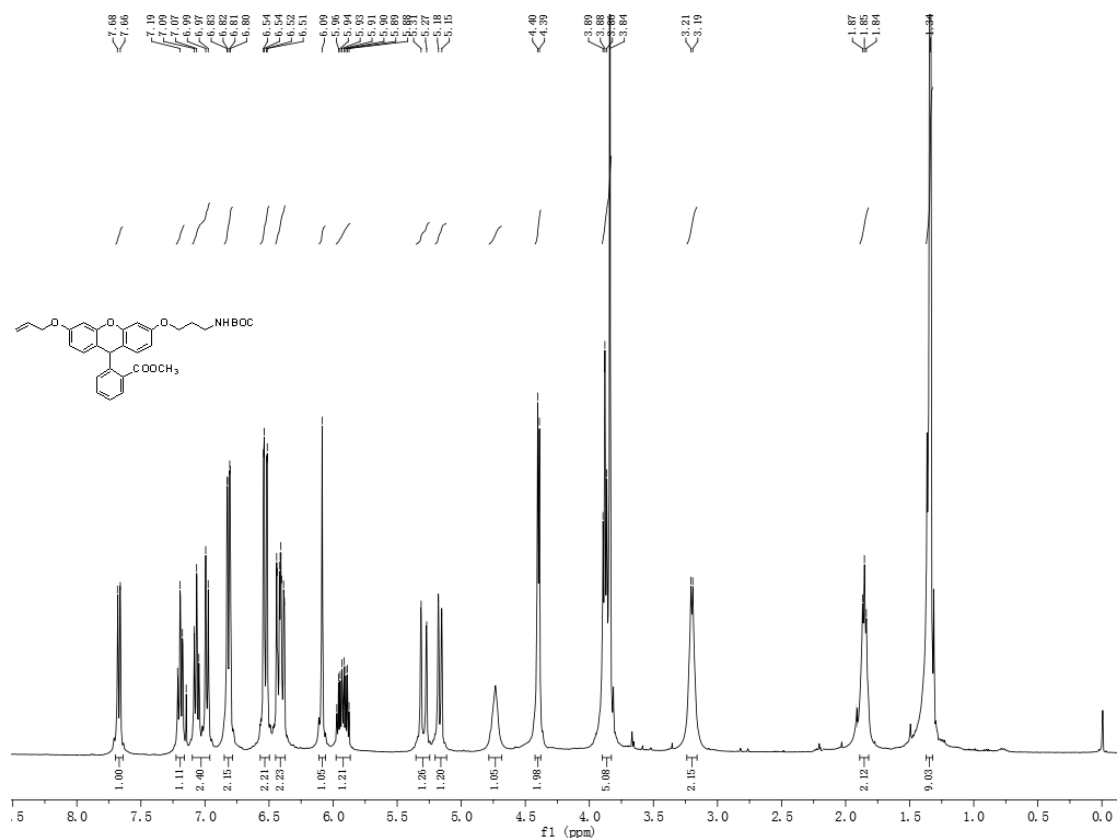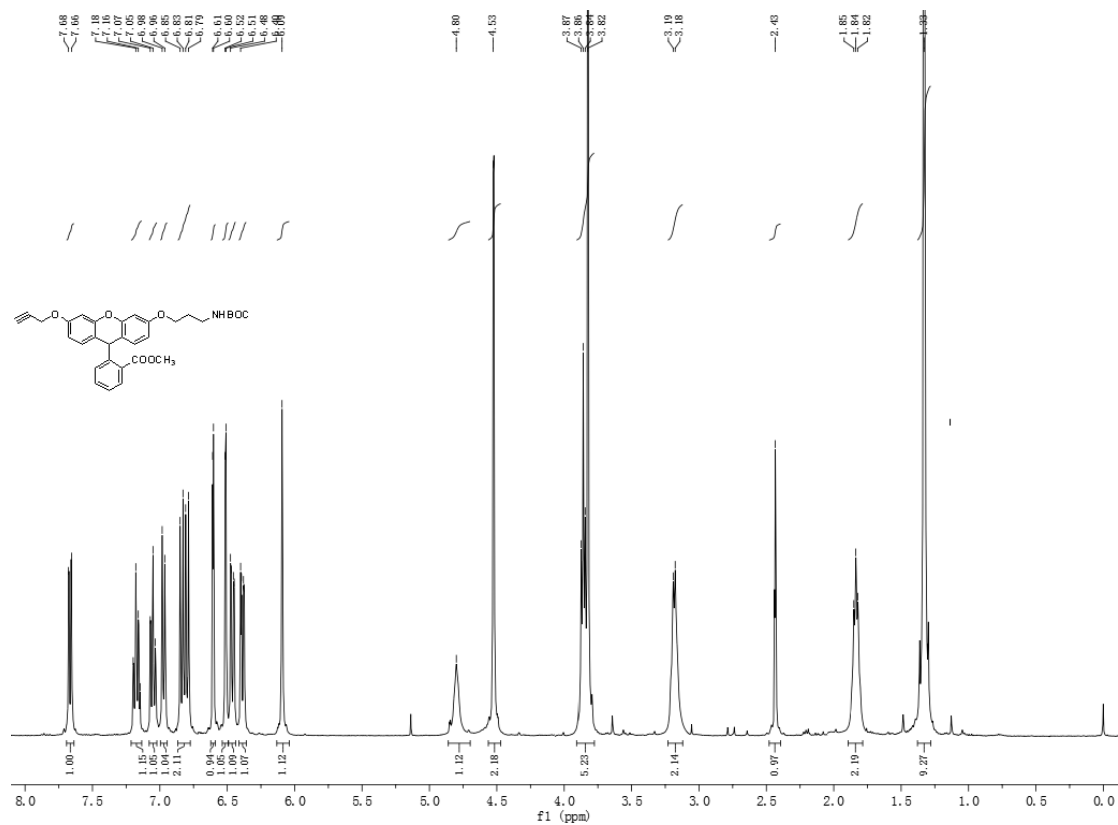

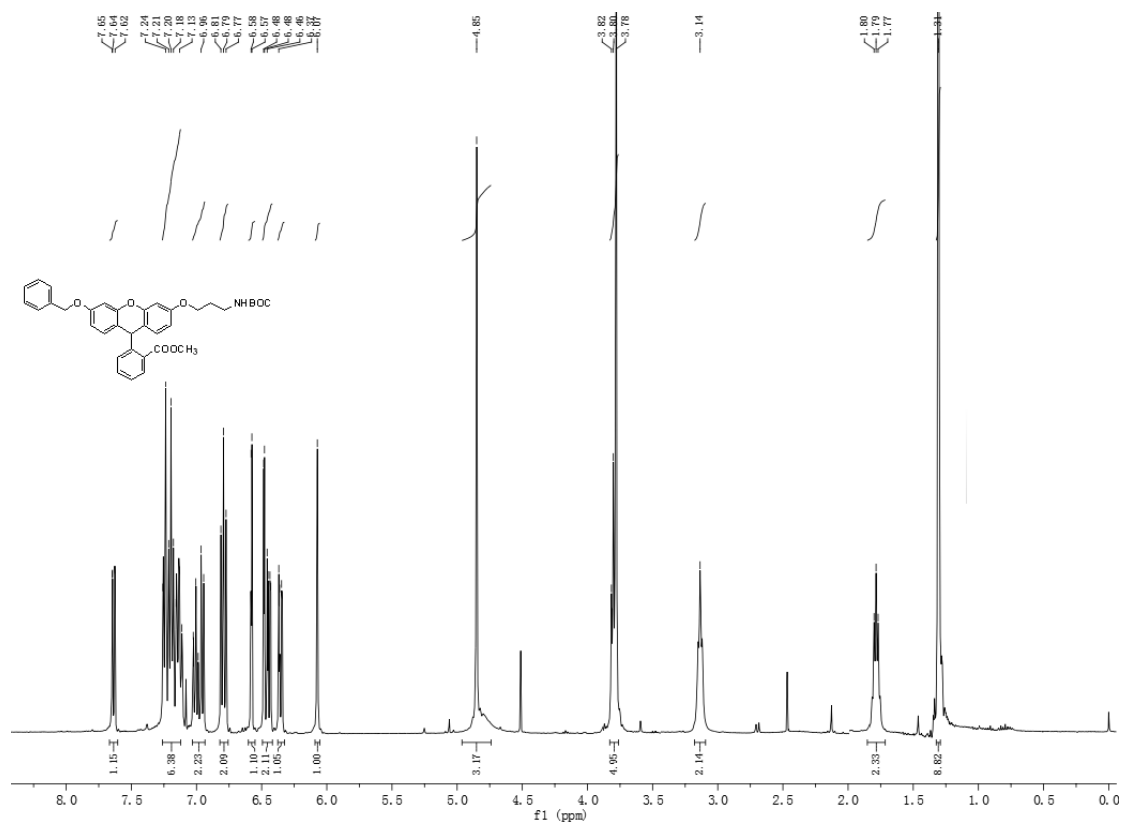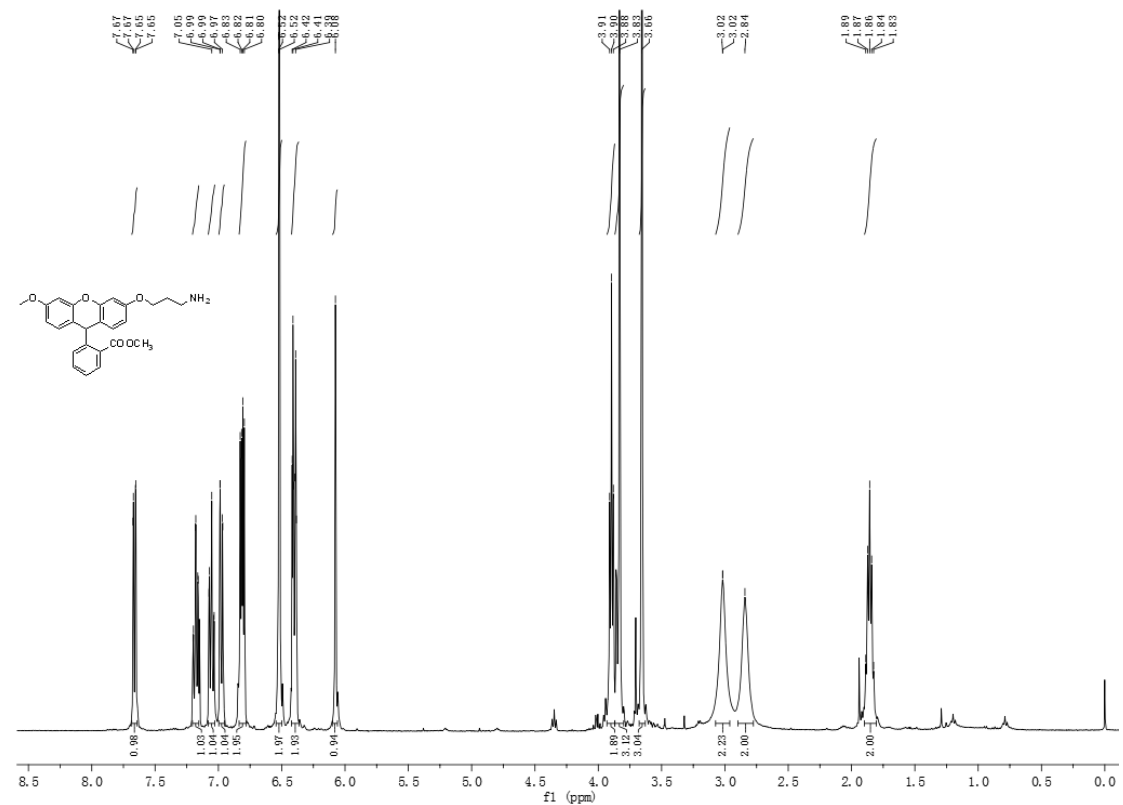

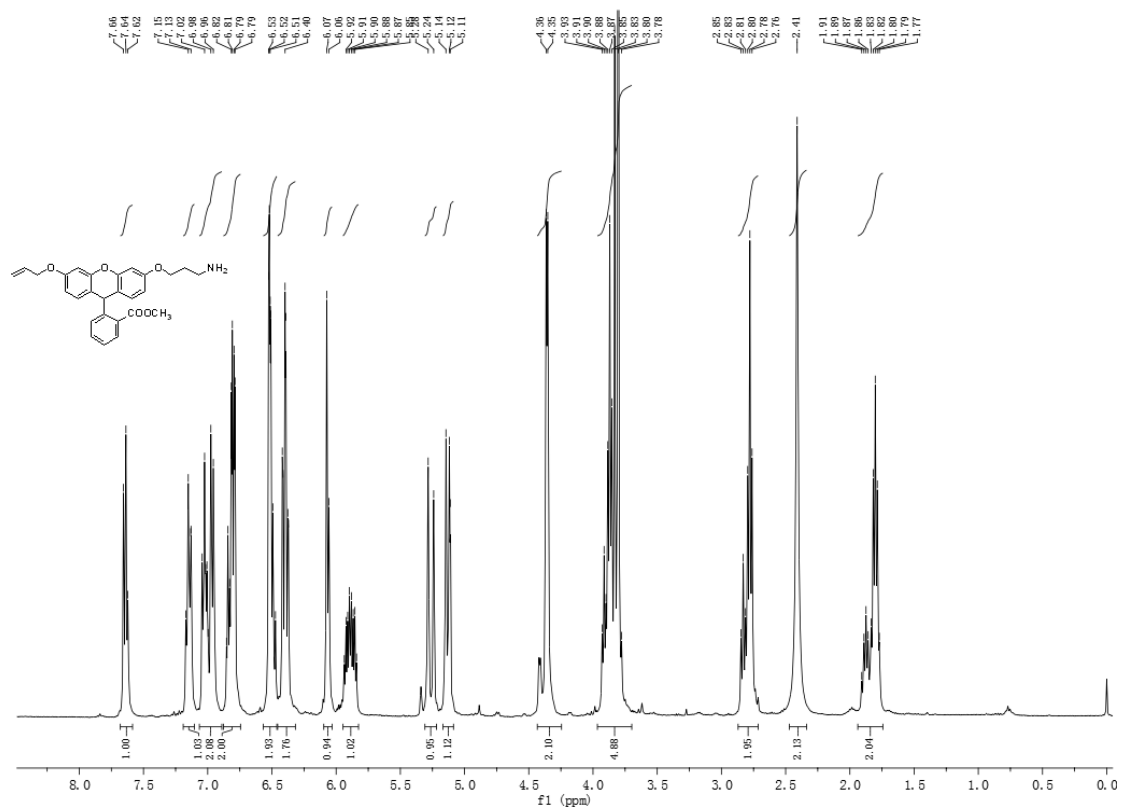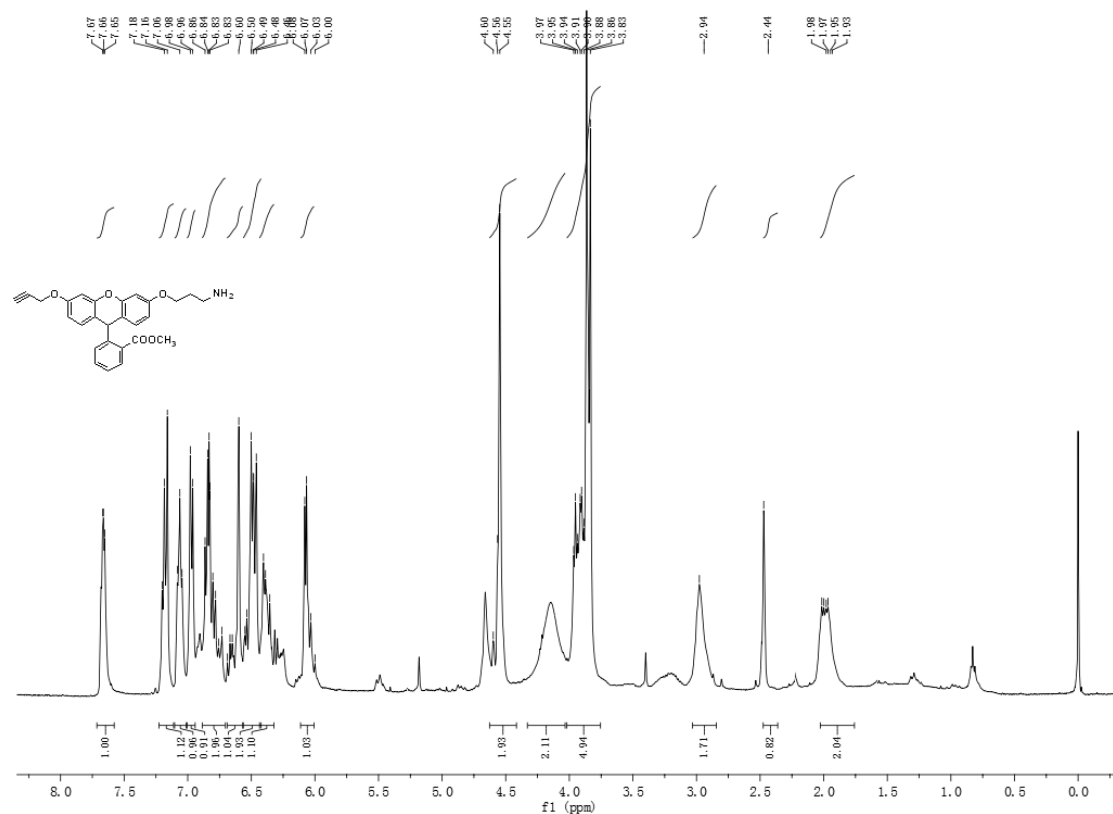

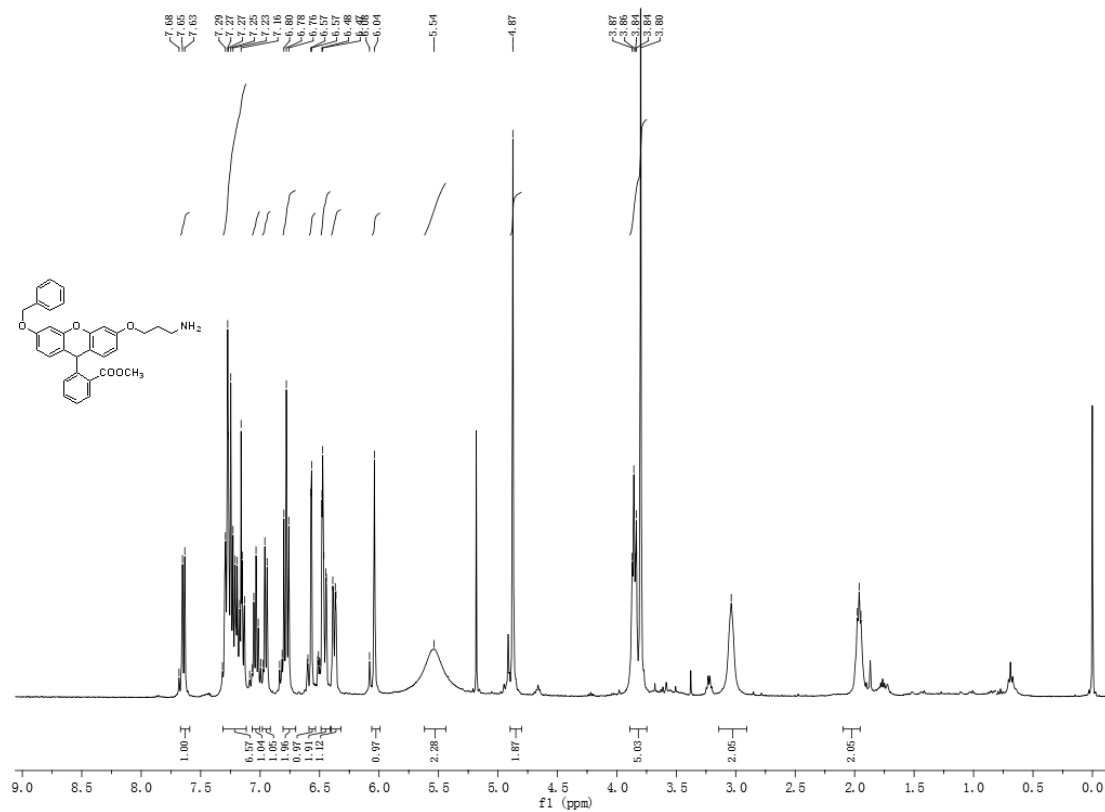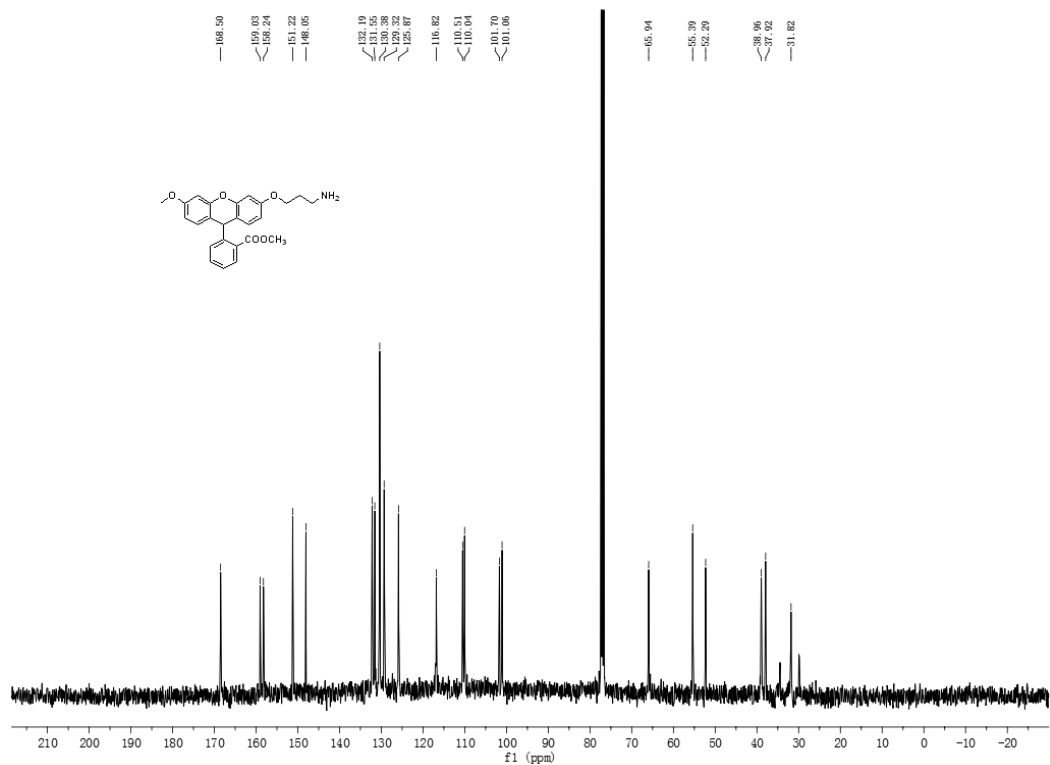

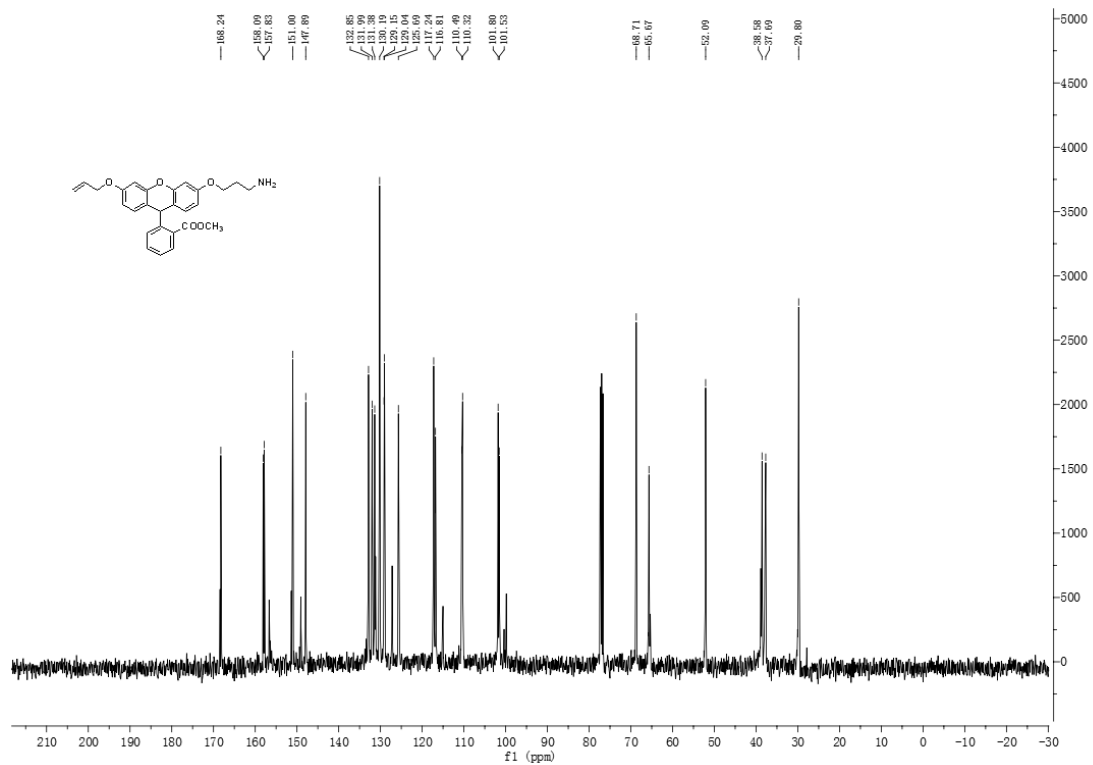

Supplement: c3ob42326c_2.pdf [file c3ob42326c_2.pdf]
